# Supplementary material for: Unlocking the potential of publicly available microarray data using inSilicoDb and inSilicoMerging R/Bioconductor packages
Source: Springer Nature journal article supplement (doi:10.1186/1471-2105-13-335), 2012-12-01

**NONE (No Transformation)**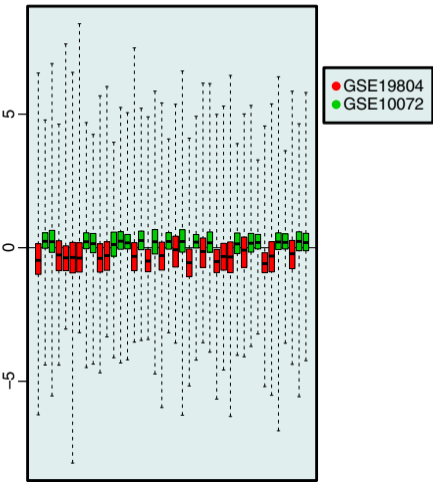**COMBAT**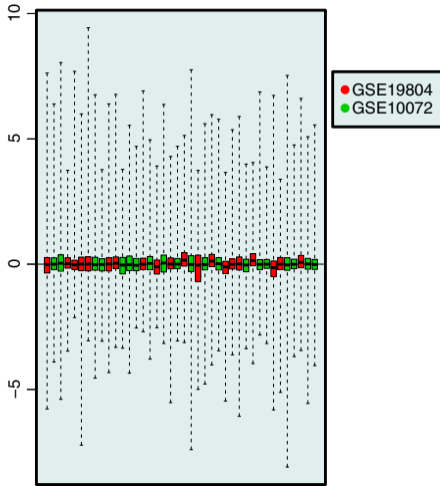

Supplement: 12859_2012_5651_MOESM4_ESM.pdf [file 12859_2012_5651_MOESM4_ESM.pdf]
